# Supplementary material
Source: PubMed Central journal article supplement (PMC5704945)
Supplement: NIHMS880359-supplement-216_2017_407_MOESM1_ESM.pdf [file NIHMS880359-supplement-216_2017_407_MOESM1_ESM.pdf]

**Analytical and Bioanalytical Chemistry**

**Electronic Supplementary Material**

**Offline Pentafluorophenyl (PFP)-RP prefractionation as an alternative to high-pH RP for comprehensive LC-MS/MS proteomics and phosphoproteomics**

Andrew V. Grassetti, Rufus Hards, Scott A. Gerber

Additional files available under “[Supplementary material](#)”.

## ESM\_1 Chromatographic Gradient Tables

**Table S1a** Hi-pH RP (pH8) TMT labeled peptide prefractionation

| Time (min) | %B   | Flow Rate ( $\mu\text{L}/\text{min}$ ) |
|------------|------|----------------------------------------|
| 0          | 5    | 150                                    |
| 1.5        | 5    | 150                                    |
| 6          | 12   | 150                                    |
| 14         | 16.5 | 150                                    |
| 62         | 42   | 150                                    |
| 63         | 100  | 150                                    |
| 69         | 100  | 150                                    |
| 70         | 5    | 150                                    |
| 98         | 5    | 150                                    |

**Table S1b** PFP TMT labeled peptide prefractionation

| Time (min) | %B  | Flow Rate ( $\mu\text{L}/\text{min}$ ) |
|------------|-----|----------------------------------------|
| 0          | 5   | 135                                    |
| 1          | 5   | 135                                    |
| 1.5        | 16  | 135                                    |
| 61         | 55  | 135                                    |
| 62         | 100 | 135                                    |
| 68         | 100 | 135                                    |
| 69         | 5   | 135                                    |
| 97         | 5   | 135                                    |

**Table S1c** Hi-pH RP (pH8) phosphopeptide prefractionation

| Time (min) | %B  | Flow Rate<br>( $\mu\text{L}/\text{min}$ ) |
|------------|-----|-------------------------------------------|
| 0          | 0   | 135                                       |
| 1.5        | 0   | 135                                       |
| 6          | 7   | 135                                       |
| 14         | 11  | 135                                       |
| 62         | 37  | 135                                       |
| 63         | 100 | 135                                       |
| 69         | 100 | 135                                       |
| 70         | 0   | 135                                       |
| 98         | 0   | 135                                       |

**Table S1d** PFP phosphopeptide prefractionation

| Time (min) | %B  | Flow Rate<br>( $\mu\text{L}/\text{min}$ ) |
|------------|-----|-------------------------------------------|
| 0          | 5   | 135                                       |
| 1          | 5   | 135                                       |
| 1.5        | 25  | 135                                       |
| 61.5       | 82  | 135                                       |
| 62         | 100 | 135                                       |
| 68         | 100 | 135                                       |
| 69         | 5   | 135                                       |
| 100        | 5   | 135                                       |

**Table S1e** Hi-pH RP (pH10) TMT labeled peptide prefractionation

| Time (min) | %B   | Flow Rate<br>( $\mu$ L/min) |
|------------|------|-----------------------------|
| 0          | 5    | 150                         |
| 1.5        | 5    | 150                         |
| 6          | 12   | 150                         |
| 14         | 16.5 | 150                         |
| 62         | 48   | 150                         |
| 63         | 100  | 150                         |
| 69         | 100  | 150                         |
| 70         | 5    | 150                         |
| 98         | 5    | 150                         |

ESM\_2

a

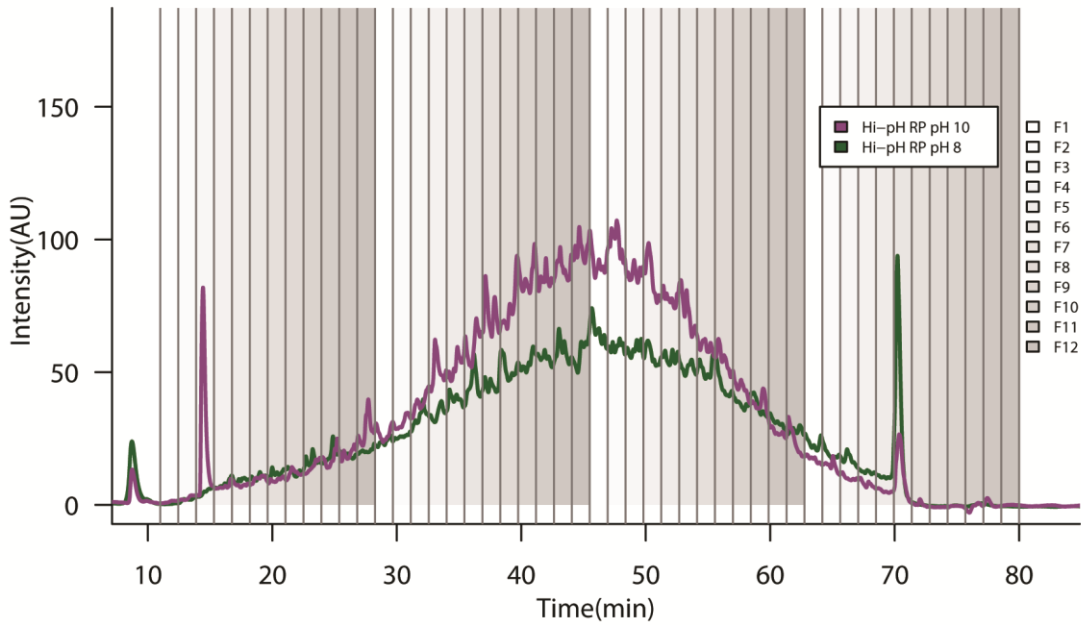

b

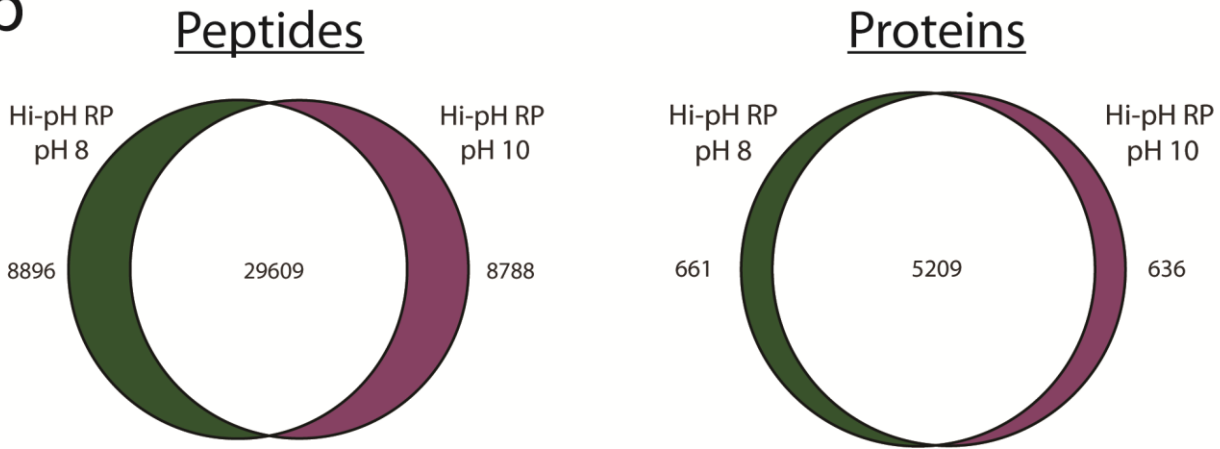

**Fig. S1** pH 8 and pH 10 Hi-pH RP Peptide Identifications (a) Chromatograms are of 25  $\mu$ g TMT labeled peptides with fractional combinations overlaid; every 12<sup>th</sup> fraction was combined. (b) Proportional Venn diagrams illustrating the similarity of peptide and protein identifications from pH 8 and pH 10 Hi-pH RP

**ESM\_3 Spreadsheet of Peptides Identified in pH 8 and pH 10 Hi-pH RP Analyses** (see separate files)

**ESM\_4 Spreadsheet of Proteins Identified in pH 8 and pH 10 Hi-pH RP Analyses** (see separate files)

ESM\_5

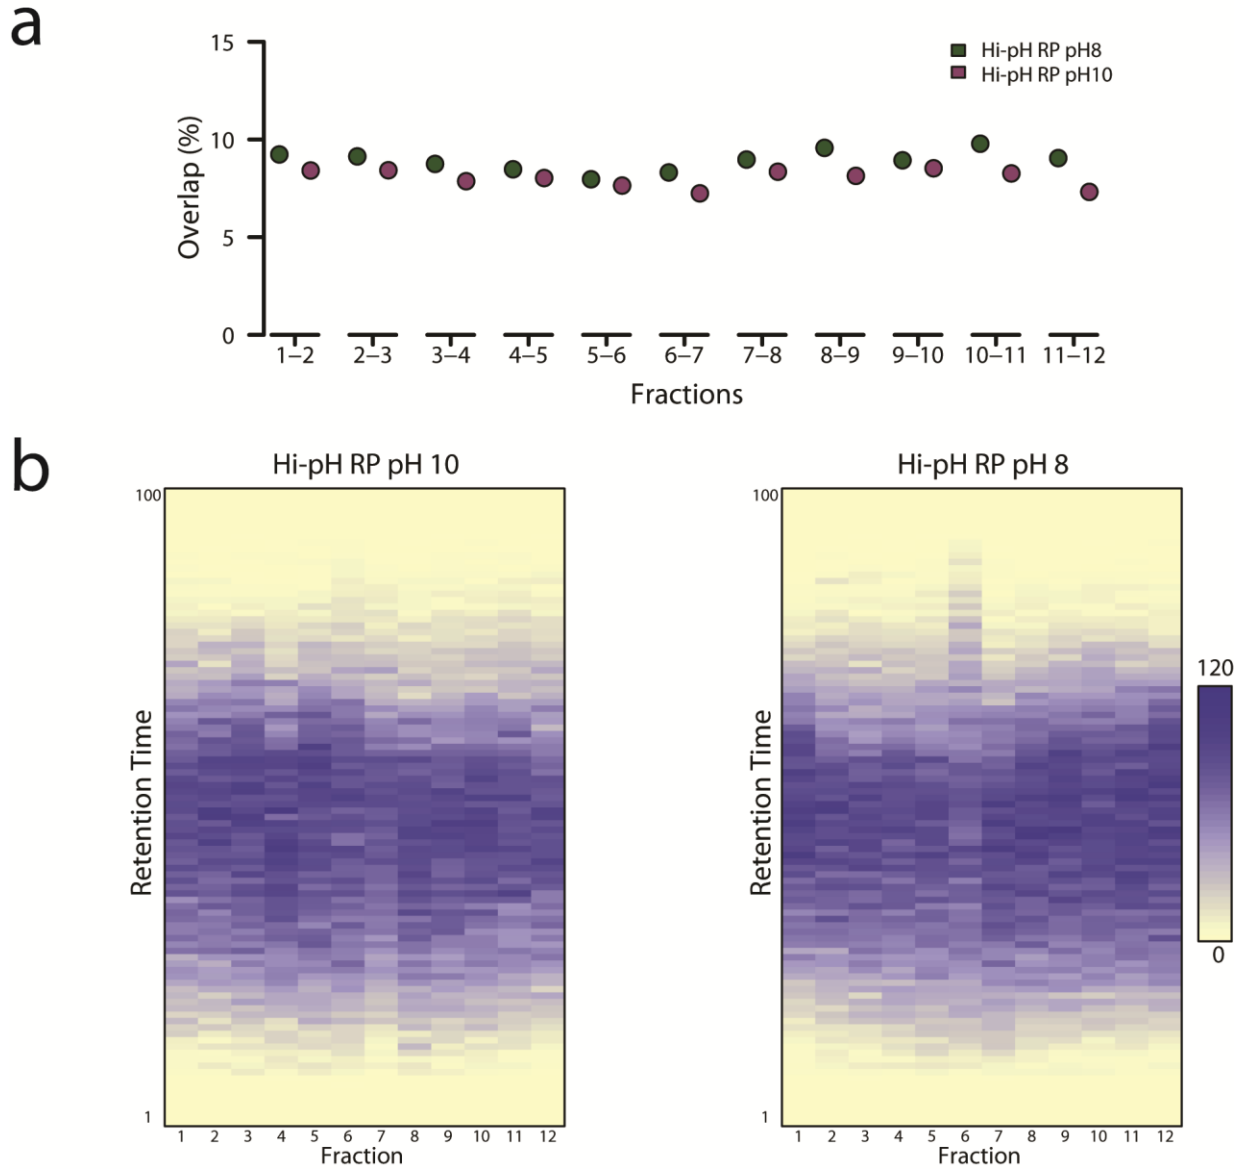

**Fig. S2** pH 8 and pH 10 Hi-pH RP Fractional Overlap and Orthogonality (a) Overlap between each adjacent fraction is expressed as a percentage of the total peptides identified between the pair of fractions. (b) Heat maps of unique peptide retention time distributions plotted for each combined fraction in pH 8 and pH 10 Hi-pH RP analyses. Each peptide was allocated to 1 of 100 bins based on its average retention time between 1 and 138 minutes. The white-blue scale represents 0-120 peptides in each bin.

**ESM\_6 Spreadsheet of Peptides Identified in PFP RP Analyses** (see separate files)

**ESM\_7 Spreadsheet of Proteins Identified in PFP RP Analyses** (see separate files)

**ESM\_8 Spreadsheet of Peptides Identified in Hi-pH RP Analyses** (see separate files)

**ESM\_9 Spreadsheet of Proteins Identified in Hi-pH RP Analyses** (see separate files)

**ESM\_10 Spreadsheet of Phosphorylated Peptides Identified in PFP and Hi-pH RP Analyses** (see separate files)
